# Supplementary material for: Rod-like micelles of octadecyltrimethylammonium bromide and their freezing upon solubilised styrene polymerisation
Source: Royal Society of Chemistry journal article supplement (doi:10.1039/c6ra18794c), 2016-01-01
Supplement: c6ra18794c1.pdf [file c6ra18794c1.pdf]

## Supporting information

### Rod-like micelles of octadecyltrimethylammobium bromide and their freezing upon solubilised styrene polymerisation

Jianxi Zhao\*, Hongbin Yu, Shenglu Deng

Institute of Colloid and Interface Chemistry, College of Chemistry and Chemical Engineering,  
Fuzhou University, Fuzhou, Fujian, 350108, P. R. China

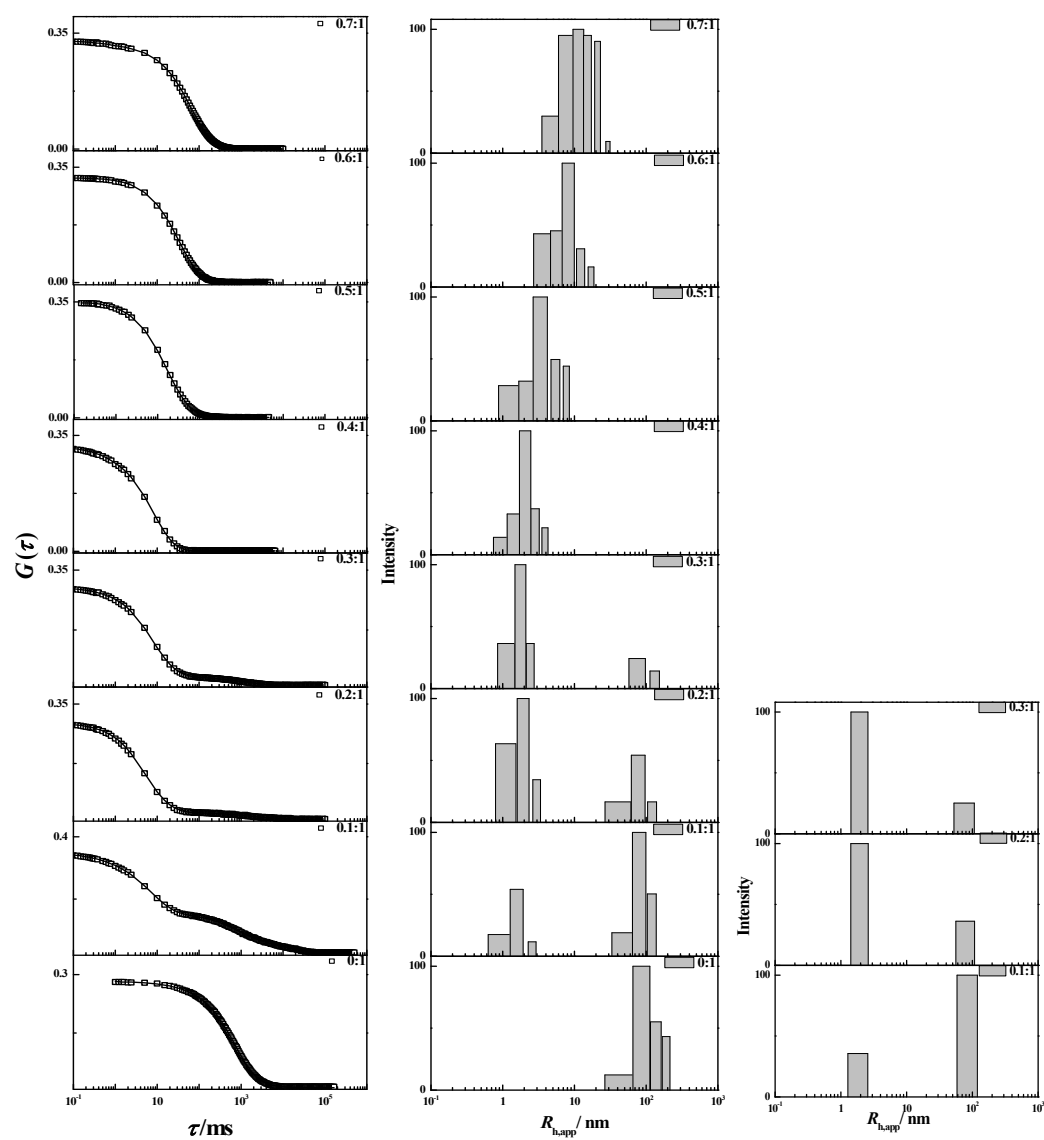

Fig. S1 Time correlation functions (left) and intensity fraction distribution (CONTIN, middle;

Dblexp, right) measured at a 90° angle and 30 °C for C<sub>18</sub>TABr (15 mmol·L<sup>-1</sup>) in ethanol/water (10/90 wt%) with different mole ratios of SNphs to C<sub>18</sub>TABr.

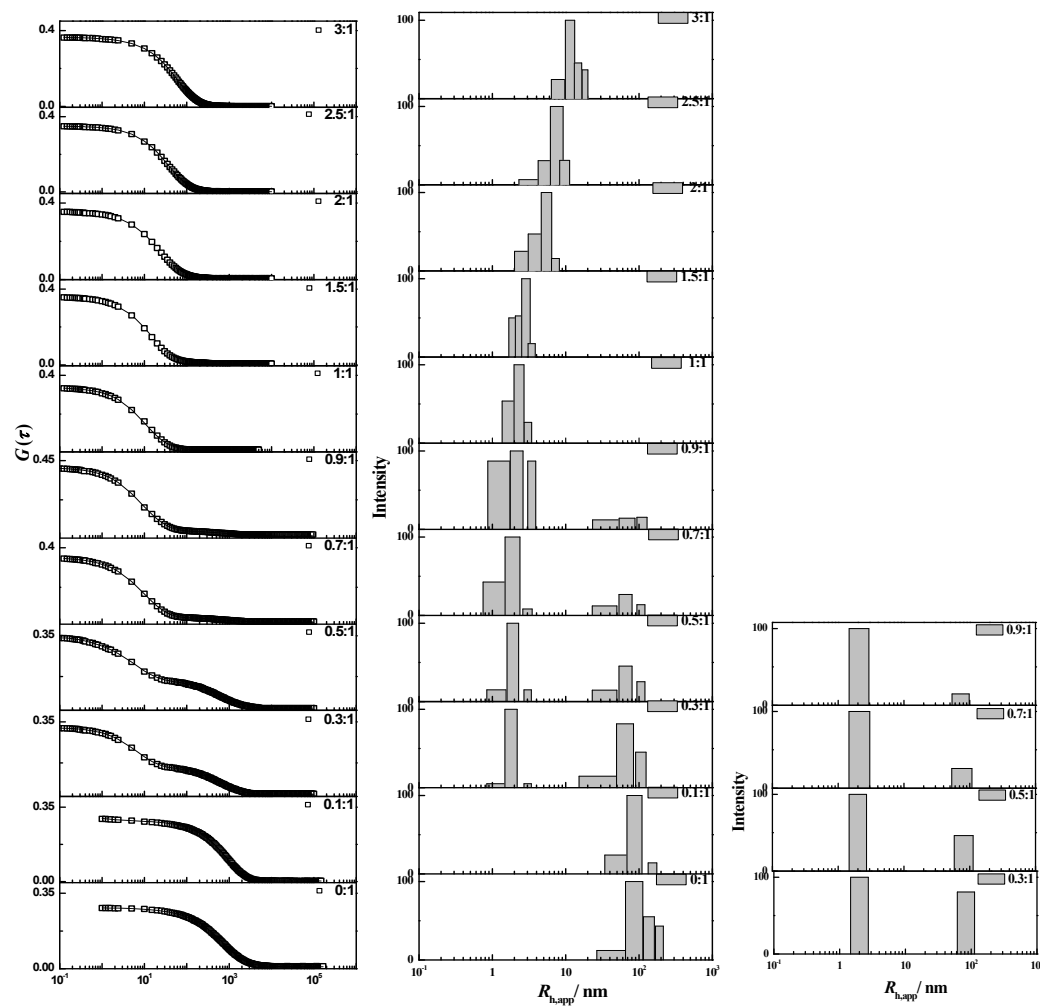

**Fig. S2** Similar to Fig.S1 but in the presence of SBzs.

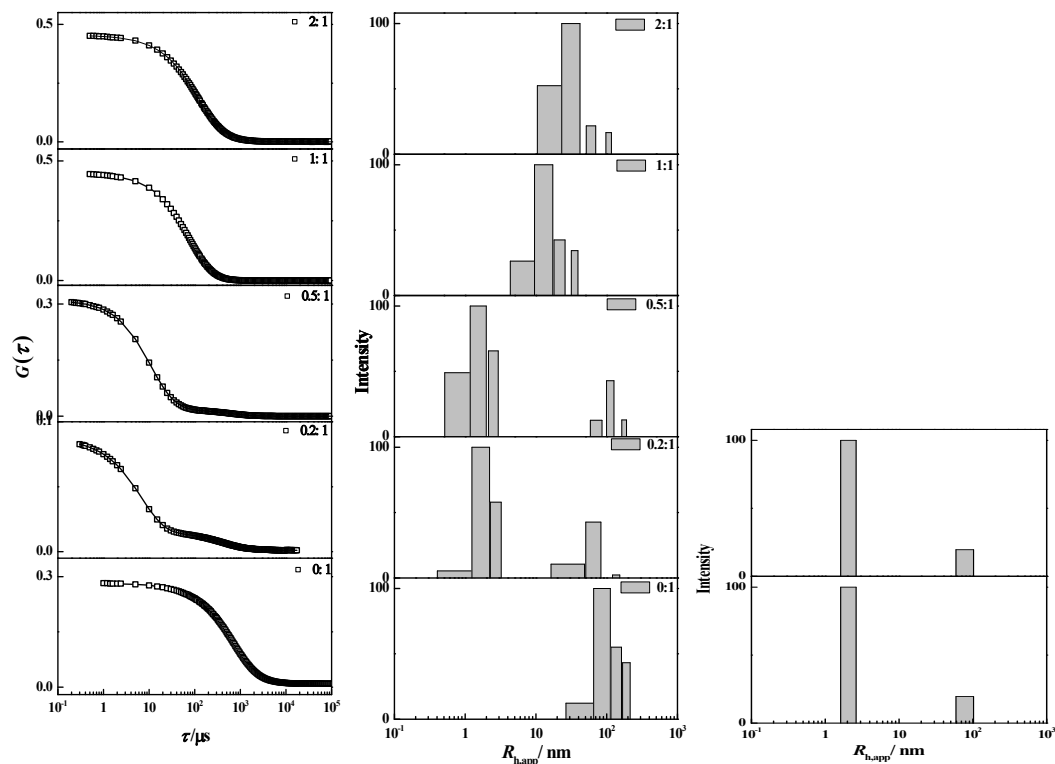

Fig. S3 Similar to Fig.S1 but in the presence of NaSaL.

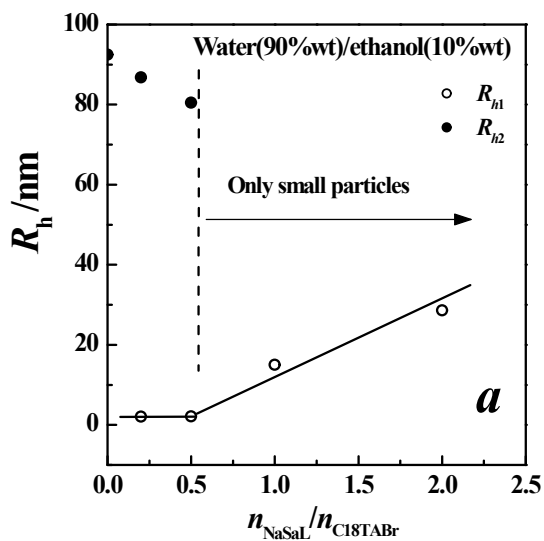

Fig. S4  $R_h$  as a function of the mole ratio of NaSaL to surfactant for  $C_{18}TABr$  ( $15\text{mmol}\cdot\text{L}^{-1}$ ) in ethanol/water (10/90 wt%), where  $R_{h1}$  and  $R_{h2}$  represent apparent hydrodynamic radius of large and small aggregates, respectively, derived according to **Dblexp** software.

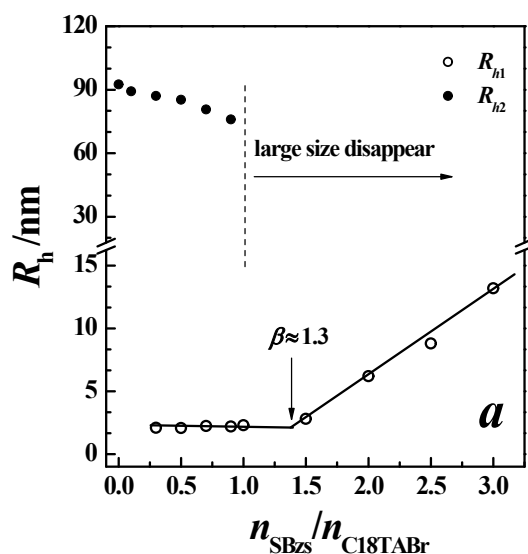

**Fig. S5**  $R_h$  as a function of the ratio of SBzs to surfactant for  $C_{18}TABr$  ( $15\text{mmol}\cdot\text{L}^{-1}$ ) in ethanol/water (10/90 wt%), where  $R_{h1}$  and  $R_{h2}$  represent apparent hydrodynamic radius of large and small aggregates, respectively, derived according to **Dblexp** software.

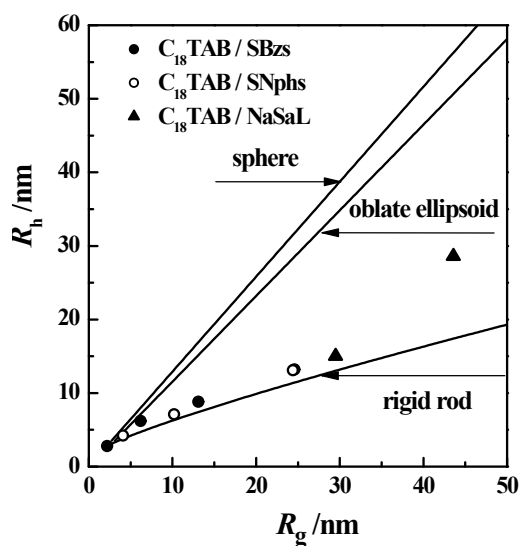

**Fig. S6** Theoretical  $R_h$  vs  $R_g$  curves and the experimental points for  $C_{18}TABr$  ( $15\text{mmol}\cdot\text{L}^{-1}$ ) micelles in ethanol/water (10/90 wt%), in the presence of SBzs (●), 1.5, 2.0, 2.5, 3.0; SNphs (○), 0.5, 0.6, 0.7; NaSaL (▲), 1, 2. The data is the value of  $n_{\text{SNphs}}/n_{\text{C18TABr}}$ , corresponding to the points of each salt, from left to right.

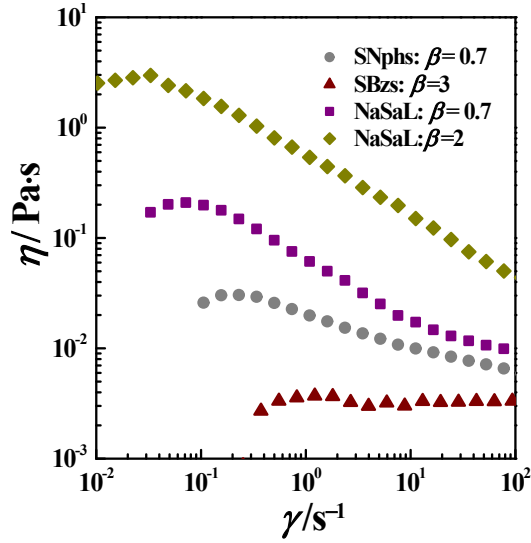

**Fig. S7** Steady-state viscosity  $\eta$  against shear rate  $\gamma$  for  $C_{18}TABr$  ( $15\text{mmol}\cdot\text{L}^{-1}$ ) in ethanol/water (10/90 wt%) in the presence of organic salts with different  $\beta$  at  $30\text{ }^\circ\text{C}$ .

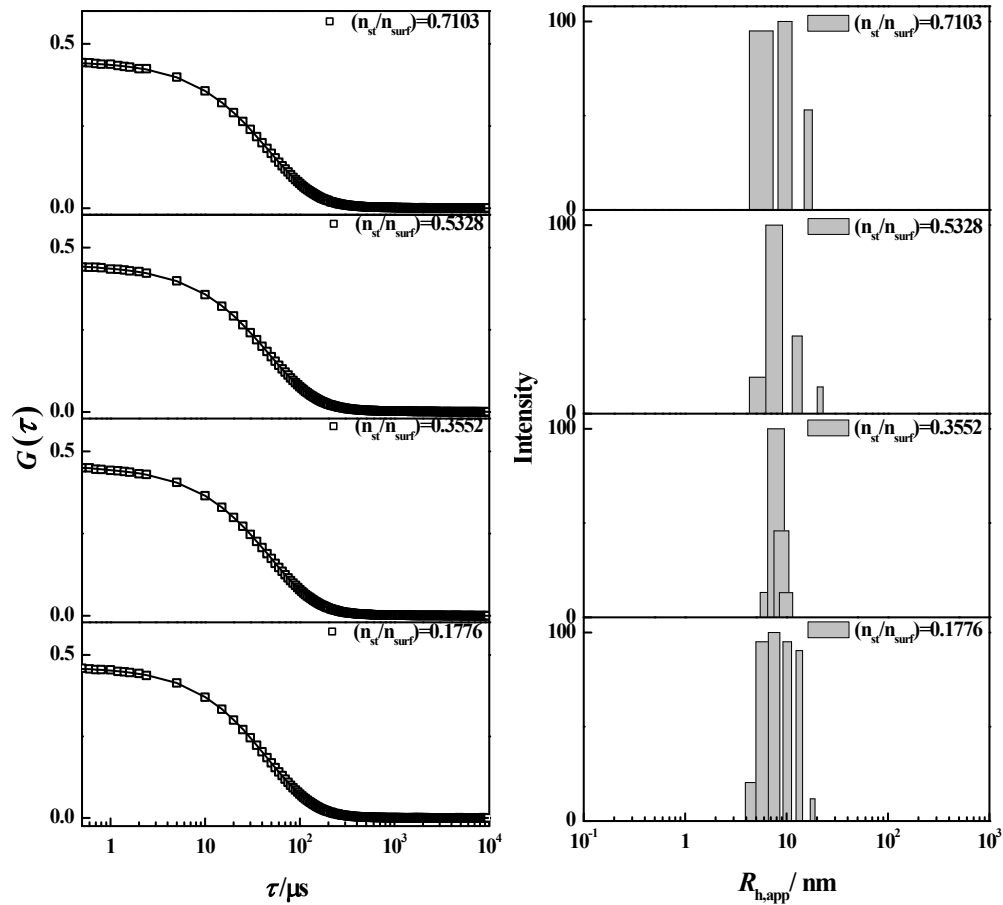

**Fig. S8** Time correlation functions and intensity–fraction distribution measured at a  $90^\circ$  angle and analyzed by CONTIN model for  $C_{18}TABr$  ( $15\text{mmol}\cdot\text{L}^{-1}$ )/SNphs ( $n_{\text{SNphs}}/n_{C_{18}TABr} = 0.5$ ) at different mole ratios of styrene to surfactant ( $n_{\text{st}}/n_{\text{surf}}$ ) at  $30\text{ }^\circ\text{C}$

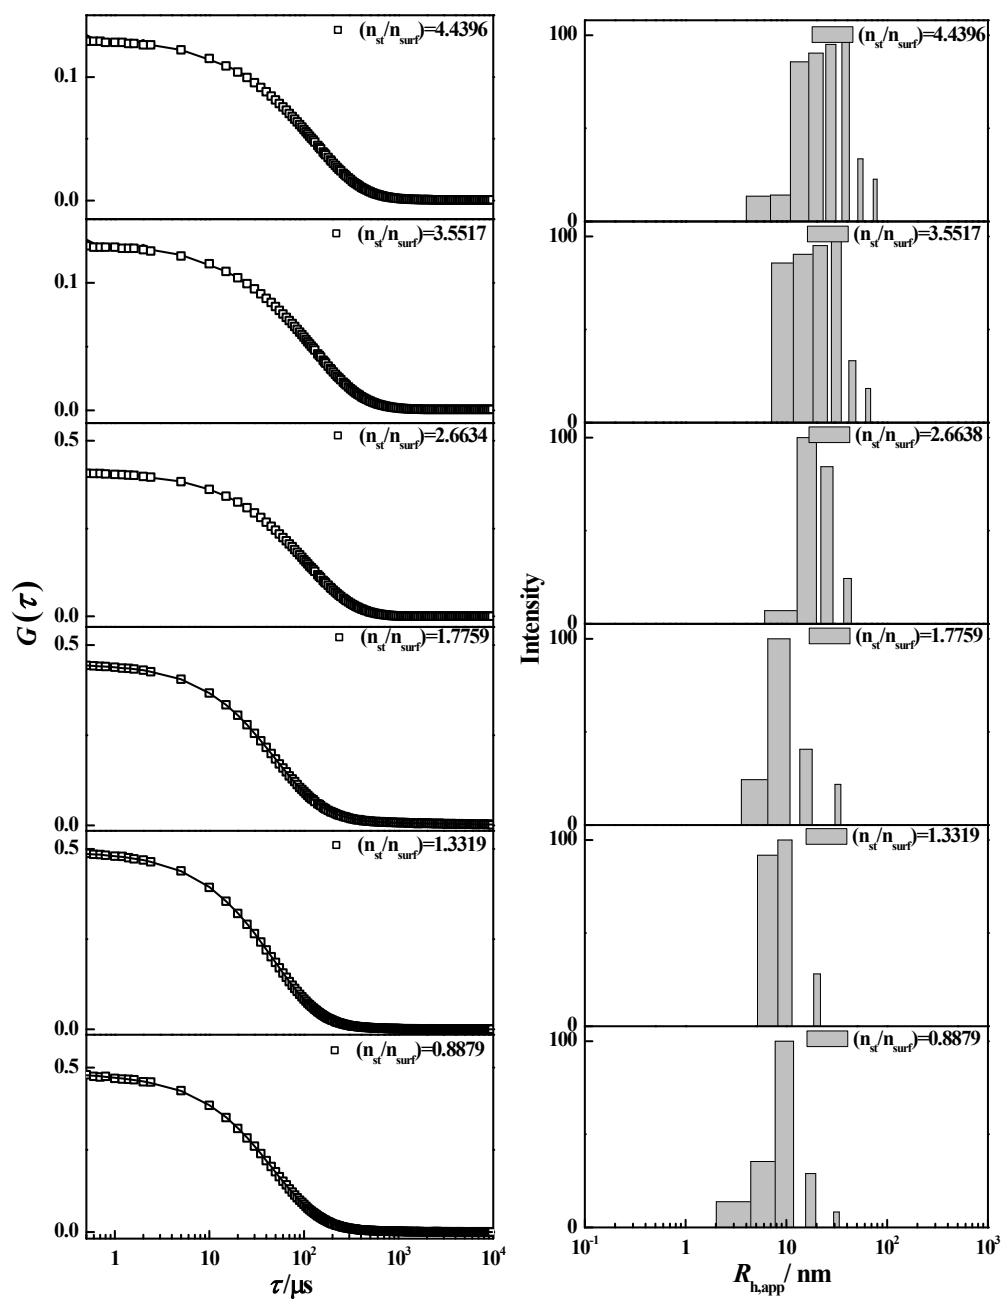

**Fig. S9** Similar to Fig. S8, but after polymerizing for 8 h using  $K_2S_2O_8$  under 70 °C.

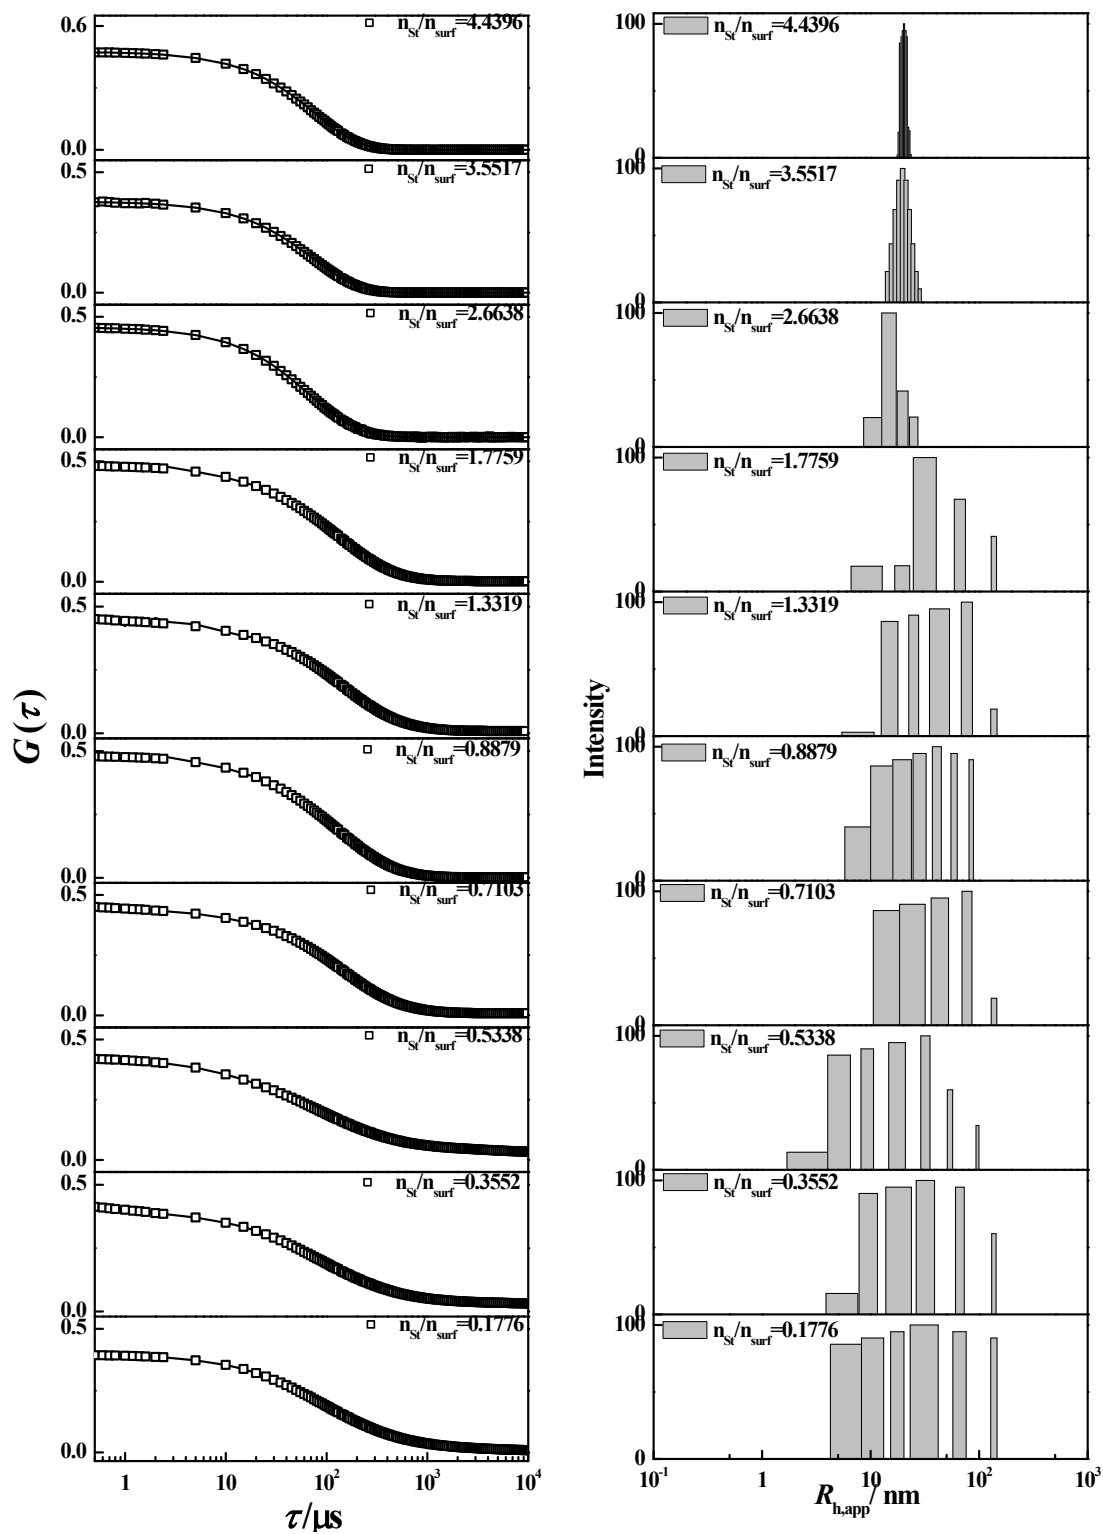

Fig. S10 Time correlation functions and intensity-fraction distribution measured at a 90° angle and analyzed by CONTIN model for the polymerized samples after 100 % diluting.

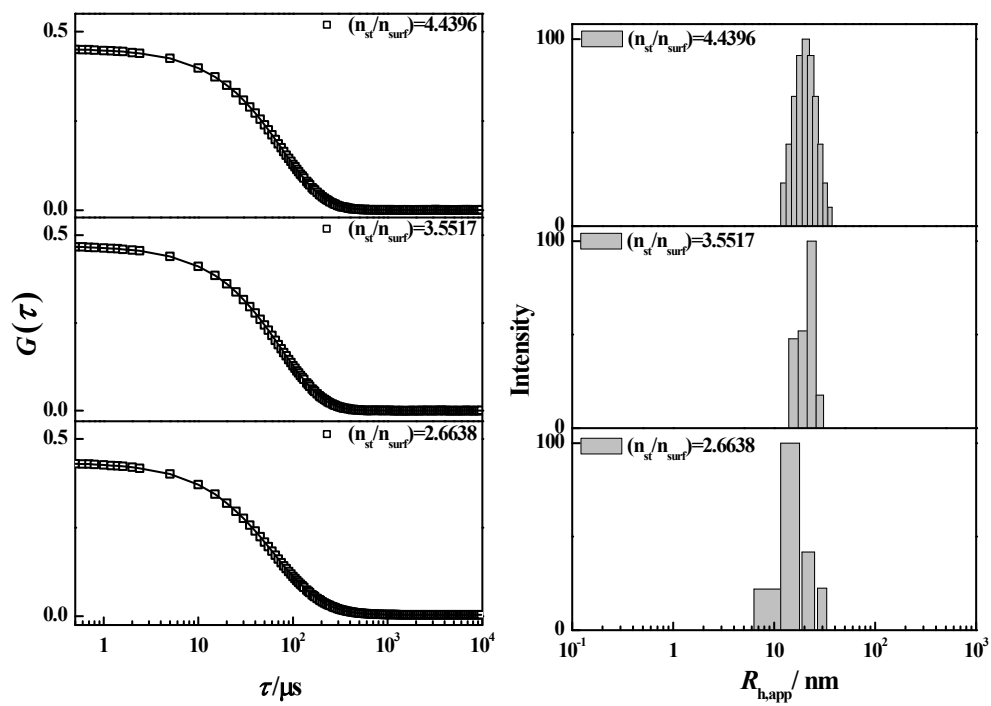

**Fig. S11** Time correlation functions and intensity-fraction distribution measured at a  $90^\circ$  angle and analyzed by CONTIN model for the polymerized samples after 400 % diluting.
